# Supplementary material for: Photoredox vs. energy transfer in a Ru(ii)–Fe(ii) supramolecular complex built with an heteroditopic bipyridine-terpyridine ligand
Source: Royal Society of Chemistry journal article supplement (doi:10.1039/b710640h), 2007-11-23
Supplement: b710640h.pdf [file b710640h.pdf]

Supplementary information

**Photoredox vs energy transfer in a Ru(II)-Fe(II) supramolecular complex built with an heteroditopic bipyridine-terpyridine ligand.**

**Jean Lombard, Jean-Claude Leprêtre,<sup>§</sup> Jérôme Chauvin, Marie-Noëlle Collomb,\* and Alain Deronzier\***

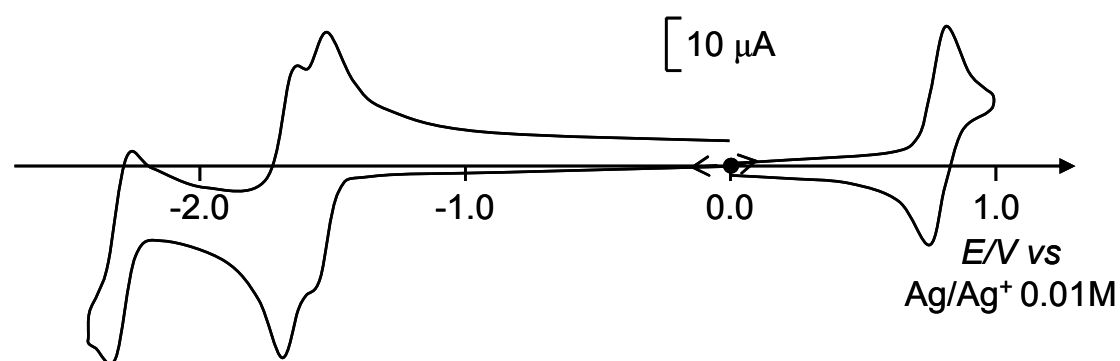

**Figure S1.** Cyclic voltammogram of a 0.46 mM solution of **(III)** in CH<sub>3</sub>CN + 0.05 M Bu<sub>4</sub>NPF<sub>6</sub> at a platinum electrode (0.5 cm of diameter); scan rate: 100 mV s<sup>-1</sup>.
